# Supplementary material for: High Prevalence of Undernutrition among Children in Gondar Town, Northwest Ethiopia: A Community-Based Cross-Sectional Study
Source: Int J Pediatr. 2017 Dec 12;2017:5367070. doi: 10.1155/2017/5367070 (PMC5745770; doi:10.1155/2017/5367070)
Supplement: Supplementary Materials — The dataset, “mat.5367070.v2”, provided as supplementary material includes the anthropometric data of children aged 6–59 months who participated in the study in MS Excel Workbook format (.xlsx). [file 5367070.f1.xlsx]

## Sheet: Sheet1
ID	Sex	Age (m)	Weight (kg)	Height (cm)	WHZ	HAZ	WAZ
19	Male	20	7.6	70	-1.27	-5.05	-3.52
20	Male	20	9.2	77	-0.89	-2.56	-1.87
21	Female	12	8.8	69	1.09	-1.94	-0.13
22	Female	32	11.6	85	0.2	-1.98	-0.97
23	Male	45	14	94	0.16	-1.87	-0.99
24	Male	19	9.2	74	-0.13	-3.35	-1.71
25	Female	33	14	88	1.55	-1.31	0.43
26	Female	24	11	81	0.57	-1.47	-0.35
27	Female	36	12.8	89	0.36	-1.59	-0.62
28	Female	17	8.2	71	-0.22	-3.04	-1.67
29	Female	22	11	81	0.73	-1.16	-0.05
30	Female	51	12	90	-0.59	-3.27	-2.43
31	Female	27	10.2	76	0.82	-3.63	-1.41
32	Female	38	13	75	3.57	-5.5	-0.7
33	Male	48	13.3	95	-0.7	-1.99	-1.64
34	Male	51	17.4	110	-0.71	1.16	0.25
35	Male	46	17	120	-3.05	4.32	0.47
36	Female	54	13.2	95	-0.57	-2.47	-1.91
37	Male	40	14.6	96	0.25	-0.68	-0.23
38	Female	38	11.4	89	-0.96	-1.87	-1.74
39	Female	20	9.8	70	1.95	-4.22	-0.68
1	Female	33	11.2	86	-0.44	-1.88	-1.37
2	Male	26	12.2	85	0.54	-1.2	-0.24
3	Female	22	10.4	79	0.55	-1.8	-0.51
4	Male	7	8.2	63	2.23	-2.84	-0.11
5	Female	9	6.4	64	-0.75	-2.54	-2.1
6	Male	7	7.8	66	0.47	-1.19	-0.41
7	Male	46	13.6	94	-0.2	-1.99	-1.3
8	Male	12	10	72	1.42	-1.8	0.22
9	Female	30	7.6	80	-3.48	-3.02	-4.19
10	Female	12	13	71	4.76	-1.17	2.93
11	Female	36	8.8	82	-2.25	-3.43	-3.68
12	Male	48	15	110	-2.48	1.59	-0.68
13	Male	42	12.4	92	-0.94	-1.98	-1.73
14	Male	48	15.2	96	0.74	-1.75	-0.57
15	Female	10	7.6	69	-0.51	-0.95	-0.88
16	Male	20	8.6	74	-0.95	-3.63	-2.47
17	Male	31	11.8	83	0.63	-2.8	-1.13
18	Female	11	5.4	63	-2.31	-3.88	-3.95
40	Female	13	8.8	67	1.66	-3.13	-0.34
41	Male	28	12.4	80	1.86	-3.16	-0.36
42	Female	32	12	89	-0.37	-0.88	-0.7
43	Female	36	11.6	84	0.45	-2.9	-1.41
44	Male	18	9.6	78	-0.59	-1.61	-1.19
45	Female	20	7.8	76	-2.07	-2.23	-2.64
46	Male	6	8.4	61	3.39	-3.1	0.52
47	Female	18	10	75	0.97	-1.97	-0.19
48	Male	8	9.6	70	1.55	-0.28	0.99
49	Female	24	10.6	79	0.61	-2.09	-0.65
50	Male	19	8	71	-0.96	-4.44	-2.96
51	Male	37	11.4	87	-0.81	-2.59	-2
52	Female	33	10.6	83	-0.32	-2.7	-1.83
53	Female	32	12.4	86	0.7	-1.71	-0.43
54	Male	42	18.2	100	2	0.04	1.36
55	Male	46	17	100	1.21	-0.53	0.47
56	Male	16	9	69	1.12	-4.34	-1.41
57	Male	41	17.8	98	2.18	-0.32	1.28
58	Male	57	13.6	97	-0.85	-2.5	-2.08
59	Female	13	7.2	65	0.18	-3.89	-2.02
60	Male	27	8	76	-2.58	-4.21	-3.92
61	Male	50	13.2	94	-0.58	-2.45	-1.84
62	Male	56	13.4	102	-2.14	-1.29	-2.13
63	Male	26	13	86	1.05	-0.88	0.31
64	Female	43	11.2	86	-0.44	-3.33	-2.36
65	Male	18	12	82	1.22	-0.1	0.83
66	Male	8	6.8	64	-0.4	-3	-2.15
67	Male	24	14.2	89	1.41	0.61	1.36
68	Male	36	15.4	99	0.25	0.79	0.58
69	Male	23	10	73	1.14	-4.65	-1.57
70	Female	16	8.2	69	0.33	-3.44	-1.49
71	Male	6	8.4	61	3.39	-3.1	0.52
72	Female	34	12	90	-0.59	-0.98	-0.92
73	Male	36	12.6	91	-0.51	-1.37	-1.07
74	Male	16	11	76	1.48	-1.63	0.4
75	Male	36	15.6	105	-0.92	2.4	0.69
76	Male	44	13.2	92	-0.14	-2.23	-1.39
77	Female	46	10	86	-1.76	-3.67	-3.49
78	Female	23	11.4	79	1.54	-2.05	0.09
79	Male	22	14	90	1.17	1.34	1.55
80	Female	48	14.8	94	0.9	-2.03	-0.6
81	Male	30	12	93	-1.58	0.31	-0.87
82	Female	33	14.2	88	1.7	-1.34	0.52
83	Male	29	11	84	-0.47	-2.15	-1.51
84	Female	48	15.4	95	1.13	-1.79	-0.31
85	Female	34	11.6	83	0.69	-2.86	-1.2
86	Female	34	11.6	83	0.69	-2.86	-1.2
87	Male	7	9.1	60	4.96	-4.22	0.85
88	Male	11	9.8	68	2.43	-2.81	0.37
89	Female	49	13.3	94	-0.28	-2.14	-1.48
90	Male	28	10.8	83	-0.44	-2.25	-1.55
91	Male	46	14.4	93	0.72	-2.23	-0.85
92	Female	27	9.4	77	-0.29	-3.34	-2.11
93	Male	38	13.2	90	0.3	-1.94	-0.87
94	Male	36	12.2	80	1.68	-4.34	-1.34
95	Female	34	13.2	92	0.05	-0.44	-0.16
96	Male	30	12	83	0.83	-2.62	-0.87
97	Male	26	10.6	82	-0.43	-2.14	-1.46
98	Female	14	8.2	67	0.92	-3.49	-1.12
99	Female	41	12	91	-0.82	-1.84	-1.63
100	Female	59	15	117	-3.88	1.72	-1.29
101	Male	17	10.8	78	0.82	-1.23	0.06
102	Male	17	10.8	79	0.61	-0.85	0.06
103	Female	51	14.6	96	0.35	-1.92	-0.93
104	Male	31	11.8	82	0.86	-3.09	-1.13
105	Male	46	13.8	97	-0.66	-1.26	-1.19
106	Male	34	12	83	0.83	-3.25	-1.29
107	Male	30	10.6	100	-4.57	2.37	-1.94
108	Female	42	14.4	94	0.6	-1.24	-0.29
109	Male	52	15	103	-0.95	-0.59	-0.98
110	Male	13	8.8	71	0.21	-2.44	-1.05
111	Female	33	11	85	-0.4	-2.16	-1.52
112	Male	33	12.8	89	0.15	-1.42	-0.65
113	Male	41	13.8	91	0.62	-2.1	-0.77
114	Female	36	11.3	88	-0.82	-1.85	-1.63
115	Female	24	10	80	-0.26	-1.78	-1.14
116	Female	53	14	96	-0.12	-2.14	-1.39
117	Male	56	14.8	96	0.42	-2.62	-1.36
118	Male	6	9.8	67	2.76	-0.3	1.95
119	Female	24	12.4	81	1.86	-1.47	0.61
120	Female	47	16	98	0.94	-0.97	0.05
121	Male	32	10.8	84	-0.7	-2.67	-1.98
122	Male	47	15.4	106	-1.29	0.78	-0.39
123	Female	20	10.6	75	1.59	-2.56	-0.04
124	Male	33	11.4	90	-1.56	-1.14	-1.62
125	Male	16	9.6	73	0.66	-2.79	-0.83
126	Female	30	11.6	90	-0.99	-0.19	-0.73
127	Female	32	13	93	-0.33	0.22	-0.06
128	Male	8	7.8	66	0.47	-2.1	-0.91
129	Male	39	11.9	87	-0.27	-2.87	-1.82
130	Female	24	9.8	82	-0.97	-1.16	-1.31
131	Female	27	10.4	78	0.62	-3.04	-1.24
132	Male	23	11.8	82	1.02	-1.65	-0.11
133	Male	41	14.8	93	1.05	-1.59	-0.21
134	Male	55	11.2	90	-1.79	-3.87	-3.44
135	Female	11	9	67	1.9	-2.29	0.26
136	Female	35	13.6	92	0.38	-0.62	-0.03
137	Male	29	12.2	86	0.29	-1.55	-0.62
138	Male	11	9.2	71	0.74	-1.52	-0.21
139	Female	20	12.8	79	2.74	-1.23	1.46
140	Female	27	10	84	-1.25	-1.27	-1.58
141	Male	42	12.6	94	-1.17	-1.47	-1.6
142	Male	16	9.6	76	-0.13	-1.63	-0.83
143	Female	24	10.4	79	0.4	-2.09	-0.81
144	Female	42	14	95	0.09	-0.99	-0.51
145	Male	31	11.8	94	-2.02	0.38	-1.13
146	Male	59	15.2	100	-0.13	-2.05	-1.35
147	Male	11	8.4	67	0.99	-3.24	-1.04
148	Male	40	16.8	99	1.29	0.09	0.91
149	Female	18	11	82	0.5	0.44	0.58
150	Female	11	7	70	-1.75	-1.1	-1.83
151	Male	42	15.4	95	1.11	-1.22	0.03
152	Female	59	16.4	103	0.18	-1.25	-0.66
153	Female	39	13.2	92	0.05	-1.29	-0.68
154	Female	26	9.6	82	-1.21	-1.63	-1.78
155	Male	19	11	80	0.61	-1.17	-0.11
156	Female	9	8.6	70	0.57	-0.06	0.36
157	Female	57	17	105	0.14	-0.61	-0.28
158	Male	37	12.4	89	-0.25	-2.06	-1.3
159	Female	33	15.1	89	2.13	-1.07	0.99
160	Male	23	11.2	78	1.24	-2.98	-0.57
161	Male	56	14	94	0.16	-3.07	-1.79
162	Male	8	8.2	62	2.65	-3.91	-0.46
163	Male	30	11.2	83	0	-2.62	-1.46
164	Male	39	13.4	95	-0.6	-0.78	-0.84
165	Female	38	13.5	98	-0.94	0.4	-0.41
166	Male	29	12.2	84	0.79	-2.15	-0.62
167	Male	9	10	70	2.02	-0.88	1.07
168	Female	26	11.6	84	0.45	-1.03	-0.2
169	Male	12	10.7	70	2.79	-2.42	0.95
170	Female	12	10.6	75	1.59	0.39	1.36
171	Female	47	16.3	97	1.34	-1.21	0.18
172	Male	9	10.8	68	3.56	-1.77	1.79
173	Male	58	19.4	101	2.51	-1.72	0.55
174	Female	12	9.6	74	0.75	0	0.57
175	Female	14	9.8	74	0.98	-0.89	0.35
176	Female	27	10.8	79	0.82	-2.75	-0.93
177	Female	31	9.8	84	-1.48	-2.08	-2.27
178	Female	21	10.8	78	1.17	-1.85	-0.04
179	Male	28	13.8	84	2.23	-1.95	0.56
180	Male	45	13	91	-0.12	-2.6	-1.59
181	Male	11	10.3	77	0.48	1.05	0.83
182	Male	22	10	79	-0.32	-2.41	-1.43
183	Female	21	11	79	1.16	-1.52	0.11
184	Female	55	15.1	104	-0.94	-0.6	-0.98
185	Male	36	13	89	0.34	-1.91	-0.81
186	Female	48	15.6	102	-0.15	-0.17	-0.21
187	Female	37	10.6	86	-1.08	-2.53	-2.26
188	Male	36	15.4	99	0.25	0.79	0.58
189	Female	22	9.2	75	0.06	-3.08	-1.53
190	Female	19	10.8	81	0.53	-0.24	0.28
191	Female	24.02	11.6	78	1.79	-2.4	0.08
192	Female	53	15.4	98	0.53	-1.69	-0.69
193	Male	41	13.3	88	0.85	-2.87	-1.08
194	Female	27	11.2	82	0.54	-1.86	-0.63
195	Male	17	9.6	69	1.87	-4.64	-1
196	Male	53	12.2	95	-1.81	-2.54	-2.68
197	Female	9	9.1	68	1.72	-0.89	0.82
198	Female	8	7.9	65	1.18	-1.59	-0.06
199	Male	24	11.8	90	-1.11	0.94	-0.26
200	Female	31	12.2	88	0.05	-0.97	-0.45
201	Male	53	16.1	98	1.01	-1.85	-0.5
202	Female	23	9.3	74	0.41	-3.63	-1.6
203	Male	35	13.2	89	0.53	-1.75	-0.59
204	Female	52	13	87	0.98	-4.05	-1.88
205	Female	30	11	81	0.57	-2.74	-1.17
206	Male	20	9.6	76	-0.13	-2.92	-1.49
207	Female	32	13.5	87	1.39	-1.43	0.24
208	Male	56	16.8	101	0.85	-1.51	-0.39
209	Female	26	11.6	80	1.37	-2.23	-0.2
210	Male	39	12.1	91	-1.02	-1.82	-1.68
211	Female	27	9	70	0.87	-5.41	-2.48
212	Female	59	14	100	-0.94	-1.88	-1.8
213	Male	32	11.2	77	1.3	-4.66	-1.68
214	Female	41	14.8	91	1.51	-1.84	0.01
215	Male	46	13	96	-1.2	-1.5	-1.67
216	Female	46	13.8	97	-0.48	-1.07	-0.96
217	Female	28	11	81	0.57	-2.36	-0.91
218	Male	8	7	67	-1.24	-1.64	-1.89
219	Male	55	15	98	0.15	-2.07	-1.19
220	Female	12	9	68	1.61	-2.33	0.05
221	Male	7	9.2	67	2.05	-1	0.95
222	Female	55	14.2	100	-0.78	-1.47	-1.43
223	Male	27	12	83	0.83	-2.05	-0.52
224	Male	12	5.8	63	-1.94	-5.36	-4.38
225	Male	24	9.6	82	-1.66	-1.68	-2.07
226	Male	30	11.4	86	-0.55	-1.74	-1.31
227	Male	18	9.6	76	-0.13	-2.32	-1.17
228	Female	12	8.2	73	-0.75	-0.39	-0.72
229	Male	24	9.4	80	-1.45	-2.33	-2.25
230	Female	32	11.2	78	1.42	-3.91	-1.26
231	Female	29	10.4	78	0.62	-3.42	-1.51
232	Male	35	15.2	91	1.79	-1.21	0.58
233	Male	37	10.2	80	-0.44	-4.46	-2.93
234	Male	18	9.8	72	1.19	-3.8	-0.99
235	Male	14	9.4	72	0.7	-2.44	-0.65
236	Male	9	10.8	66	4.32	-2.66	1.79
237	Female	15	8	80	-2.71	0.9	-1.52
238	Male	47	15.2	96	0.74	-1.63	-0.5
239	Male	31	13.4	90	0.48	-0.77	-0.05
240	Female	43	12.5	95	-1.2	-1.14	-1.48
241	Female	24	9.5	76	0.04	-3.02	-1.57
242	Female	31	14.2	82	3.04	-2.64	0.75
243	Female	9	9.2	71	1.03	0.35	0.91
244	Male	24	12.2	86	0.29	-0.37	0.03
245	Male	23	10.6	86	-1.28	-0.31	-1.06
246	Male	52	15.2	95	0.95	-2.43	-0.87
247	Female	36	10.6	93	-2.73	-0.54	-2.16
248	Male	20	11	84	-0.29	-0.07	-0.28
249	Female	20	11	80	0.95	-0.9	0.26
250	Male	10	8	67	0.4	-2.74	-1.24
251	Female	23	10.2	81	-0.11	-1.42	-0.82
252	Female	13	10.6	75	1.59	-0.09	1.16
253	Male	36	14.2	94	0.33	-0.56	-0.08
254	Male	17	10.2	77	0.36	-1.6	-0.46
255	Male	45	10.8	90	-2.27	-2.85	-3.1
256	Male	48	13.8	93	0.19	-2.46	-1.34
257	Female	38	14	95	0.09	-0.37	-0.12
258	Female	27	11	85	-0.4	-0.97	-0.78
259	Female	16	8	75	-1.53	-1.29	-1.7
260	Female	42	15	100	-0.16	0.24	0.01
261	Male	45	11.8	97	-2.68	-1.13	-2.38
262	Female	9	7.8	65	1.04	-2.13	-0.44
263	Female	20	10.4	80	0.34	-0.9	-0.19
264	Male	59	17	104	0.33	-1.18	-0.5
265	Female	12	7.2	72	-1.99	-0.78	-1.81
266	Male	39	12	85	0.34	-3.39	-1.75
267	Male	13	7.4	77	-3.62	0.03	-2.62
268	Female	48	15.2	94	1.18	-2.03	-0.4
269	Female	48	12.6	99	-1.95	-0.87	-1.83
270	Male	35	12.6	85	0.93	-2.85	-0.98
271	Female	58	14.8	95	0.7	-2.85	-1.33
272	Male	39	15.2	95	0.95	-0.78	0.19
273	Male	14	10	73	1.14	-2.04	-0.09
274	Male	36	14.2	95	0.12	-0.29	-0.08
275	Female	12	7.6	71	-1.08	-1.17	-1.35
276	Female	36	12.6	90	-0.04	-1.33	-0.74
277	Male	11	8.6	65	1.99	-4.1	-0.83
278	Female	54	14.4	88	1.85	-4.01	-1.26
279	Male	48	13.2	90	0.3	-3.18	-1.7
280	Male	26	11	80	0.47	-2.77	-1.14
281	Male	11	11	65	5	-4.1	1.44
282	Female	54	15.2	90	1.99	-3.57	-0.86
283	Male	56	21.8	115	0.73	1.61	1.56
284	Male	27	10.2	81	-0.67	-2.67	-1.92
285	Female	40	13	88	0.75	-2.45	-0.9
286	Female	14	8.6	73	-0.21	-1.26	-0.72
287	Female	44	11.2	88	-0.93	-2.97	-2.45
288	Male	8	9.2	67	2.05	-1.64	0.6
289	Male	30	12.4	87	0.24	-1.45	-0.6
290	Male	40	13	87	0.81	-3	-1.18
291	Male	36	11.6	90	-1.33	-1.64	-1.77
292	Male	17	11.4	80	1.03	-0.47	0.55
293	Male	44	15.8	105	-0.76	0.98	0.06
294	Female	13	8.4	70	0.31	-1.99	-0.72
295	Male	48	12.5	94	-1.27	-2.22	-2.14
296	Male	48	13.2	100	-1.89	-0.79	-1.7
297	Female	32	10.6	86	-1.08	-1.71	-1.72
298	Female	56	13.4	99	-1.23	-1.8	-1.93
299	Male	20	9.4	78	-0.85	-2.21	-1.68
300	Male	26	13.6	88	1.12	-0.25	0.7
301	Male	32	12.2	89	-0.45	-1.25	-0.95
302	Male	44	15.6	95	1.27	-1.49	-0.04
303	Male	17	10	75	0.61	-2.36	-0.63
304	Female	8	8.2	65	1.56	-1.59	0.25
305	Male	10	6.2	65	-1.99	-3.62	-3.49
306	Male	36	12.8	87	0.62	-2.45	-0.94
307	Female	37	15.6	93	1.66	-0.71	0.8
308	Female	48	14.9	94	0.97	-2.03	-0.55
309	Female	59	18.8	105	1.2	-0.83	0.28
310	Male	30	12.4	86	0.49	-1.74	-0.6
311	Female	27	10	84	-1.25	-1.27	-1.58
312	Male	9	7.4	65	0.22	-3.11	-1.68
313	Female	18	10	80	-0.1	-0.25	-0.19
314	Male	38	11	92	-2.5	-1.42	-2.39
315	Female	54	15	96	0.64	-2.24	-0.96
316	Female	12	8.8	65	2.29	-3.5	-0.13
317	Female	32	8.2	75	-1.41	-4.74	-3.84
318	Male	59	13	90	0.11	-4.22	-2.55
319	Male	14	10	78	-0.1	-0.02	-0.09
320	Female	24	11	79	1.02	-2.09	-0.35
321	Male	29	17	93	2.68	0.54	2.2
322	Female	18	10	82	-0.57	0.44	-0.19
323	Male	19	9.2	72	0.44	-4.08	-1.71
324	Male	18	10.6	72	2.09	-3.8	-0.28
325	Female	12	6.4	70	-2.81	-1.56	-2.82
326	Female	35	15	90	1.85	-1.15	0.72
327	Female	14	9	75	-0.18	-0.51	-0.34
328	Female	42	10.2	92	-2.98	-1.73	-3.05
329	Female	9	7.8	71	-0.78	0.35	-0.44
330	Male	40	15.4	96	0.9	-0.68	0.2
331	Male	18	13.5	83	2.35	0.27	1.9
332	Male	48	14.8	98	-0.01	-1.27	-0.78
333	Male	27	11.5	83	0.32	-2.05	-0.88
334	Male	25	10.4	88	-2.26	0.01	-1.5
335	Female	13	7.8	65	1.04	-3.89	-1.34
336	Female	43	12.8	92	-0.3	-1.87	-1.29
337	Female	20	11.4	80	1.33	-0.9	0.55
338	Female	36	13.6	90	0.8	-1.33	-0.14
339	Male	34	11.4	90	-1.56	-1.32	-1.72
340	Male	13	8	77	-2.66	0.03	-1.91
341	Female	52	13.8	100	-1.1	-1.13	-1.43
342	Male	42	15.8	98	0.78	-0.47	0.23
343	Female	20	10.4	80	0.34	-0.9	-0.19
344	Female	35	11.5	87	-0.38	-1.95	-1.38
345	Female	23	7.8	78	-2.54	-2.37	-3.13
346	Female	56	12.6	100	-2.16	-1.58	-2.4
347	Male	24	12.2	85	0.54	-0.7	0.03
348	Male	9	8	75	-2.14	1.35	-0.98
349	Male	38	13.4	94	-0.39	-0.89	-0.75
350	Female	48	15.4	100	0.13	-0.63	-0.31
351	Male	48	13	87	0.81	-3.89	-1.82
352	Male	29	13.6	92	0.23	0.24	0.31
353	Male	35	17	91	3.09	-1.21	1.5
354	Female	36	12	79	1.94	-4.22	-1.14
355	Female	19	8.4	72	-0.22	-3.28	-1.82
356	Male	30	15.2	83	3.57	-2.62	1.13
357	Male	18	10.6	78	0.6	-1.58	-0.28
358	Female	8	6.4	70	-2.81	0.52	-1.81
359	Female	18	11	75	1.98	-1.97	0.58
360	Male	56	15	95	0.79	-2.85	-1.25
361	Female	59	13	95	-0.75	-2.94	-2.36
362	Female	25	10	80	-0.26	-2.01	-1.29
363	Female	6	6	60	0.23	-2.54	-1.62
364	Female	14	7	75	-3.12	-0.51	-2.47
365	Female	24	9.6	85	-1.99	-0.23	-1.48
366	Female	21	8.6	85	-3.14	0.44	-1.95
367	Male	46	13.2	100	-1.89	-0.53	-1.55
368	Female	26	10.4	85	-1.04	-0.73	-1.1
369	Male	12	9	75	-0.66	-0.31	-0.63
370	Female	15	8.2	75	-1.24	-0.92	-1.31
371	Male	12	10	75	0.61	-0.31	0.33
372	Female	36	13.6	90	0.8	-1.33	-0.14
373	Male	36	13	87	0.81	-2.45	-0.81
374	Male	15	8	65	1.15	-5.6	-2.3
375	Male	44	13	88	0.57	-3.22	-1.51
376	Male	34	12.8	88	0.38	-1.87	-0.75
377	Female	17	8.6	75	-0.7	-1.63	-1.27
378	Male	38	11.4	85	-0.29	-3.26	-2.09
379	Female	7	7	65	-0.13	-0.99	-0.72
380	Female	42	11.4	90	-1.19	-2.22	-2.13
381	Male	48	14.6	100	-0.62	-0.79	-0.89
382	Male	42	12.2	90	-0.69	-2.48	-1.87
383	Male	42	13	93	-0.55	-1.73	-1.35
384	Female	20	9.4	76	0.08	-2.23	-1.03
385	Male	24	12	80	1.49	-2.33	-0.11
386	Male	56	15.6	103	-0.48	-1.06	-0.95
387	Female	15	10.4	72	2.07	-2.02	0.64
388	Male	38	11.2	88	-1.29	-2.47	-2.24
389	Female	40	14	93	0.49	-1.2	-0.32
390	Male	16	8.4	70	-0.03	-3.95	-2.03
391	Female	19	10	75	0.97	-2.27	-0.35
392	Male	21	12	73	3.22	-4.22	0.34
393	Female	12	7.2	70	-1.42	-1.56	-1.81
394	Male	36	11.6	89	-1.09	-1.91	-1.77
395	Male	42	16.4	97	1.44	-0.72	0.53
396	Female	31	11.2	87	-0.69	-1.24	-1.15
397	Male	23	11.2	82	0.4	-1.65	-0.57
398	Female	54	15.2	100	-0.02	-1.36	-0.86
399	Female	23	11.6	82	1.08	-1.11	0.23
400	Female	48	16	98	0.94	-1.1	-0.03
401	Male	30	10.8	94	-3.19	0.61	-1.77
402	Female	8	6.2	65	-1.5	-1.59	-2.08
403	Female	36	13.4	90	0.64	-1.33	-0.26
404	Male	36	14	90	1.02	-1.64	-0.2
405	Female	19	9.8	78	0.11	-1.25	-0.52
406	Male	23	10.6	77	0.82	-3.32	-1.06
407	Male	26	10.6	83	-0.67	-1.83	-1.46
408	Female	36	12.4	86	0.7	-2.38	-0.87
409	Male	24	11	78	0.88	-2.99	-0.87
410	Male	48	15.6	92	1.88	-2.7	-0.37
411	Male	52	21.8	103	3.37	-0.59	1.88
412	Male	22	10.2	85	-1.5	-0.36	-1.25
413	Male	42	13.6	94	-0.2	-1.47	-0.98
414	Male	26	10.6	85	-1.2	-1.2	-1.46
415	Female	18	9	70	1.06	-3.69	-1.06
416	Male	28	16.4	94	2.06	1.09	2.03
417	Female	8	6.2	66	-1.86	-1.17	-2.08
418	Female	35	11.8	82	1.11	-3.28	-1.17
419	Female	18	10	86	-1.58	1.82	-0.19
420	Female	15	6.4	75	-4.1	-0.92	-3.42
421	Female	12	8.8	80	-1.57	2.33	-0.13
422	Male	20	10.6	75	1.29	-3.27	-0.61
423	Female	29	9.1	78	-0.88	-3.42	-2.66
424	Female	30	10	86	-1.76	-1.32	-1.97
425	Female	24	12	77	2.34	-2.71	0.35
426	Male	11	10.4	69	2.78	-2.38	0.92
427	Male	30	12.8	88	0.38	-1.15	-0.33
428	Male	41	12.2	84	0.79	-3.89	-1.78
429	Female	36	11.2	81	0.77	-3.69	-1.7
430	Male	14	15.2	92	1.72	5.63	3.84
431	Male	32	12	84	0.59	-2.67	-1.09
432	Male	39	13	87	0.81	-2.87	-1.09
433	Male	33	10.2	85	-1.69	-2.54	-2.57
434	Male	48	12.8	88	0.38	-3.65	-1.94
435	Male	48	11	87	-1.27	-3.89	-3.16
436	Female	24	8.9	82	-2.11	-1.16	-2.13
437	Male	32	13	87	0.81	-1.82	-0.41
438	Female	33	11.8	84	0.63	-2.43	-0.95
439	Male	33	9.4	84	-2.47	-2.82	-3.24
440	Female	34	12.2	86	0.52	-2.06	-0.79
441	Female	13	7.3	66	-0.01	-3.51	-1.91
442	Male	29	10.4	84	-1.17	-2.15	-1.99
443	Female	25	8.2	71	-0.41	-4.76	-3.01
444	Female	12	9.6	72	1.23	-0.78	0.57
445	Male	9	8.4	68	0.64	-1.77	-0.53
446	Male	12	11	66	4.57	-4.1	1.21
447	Male	42	14.4	92	0.93	-1.98	-0.51
448	Male	34	14.2	94	0.33	-0.21	0.12
449	Female	8	7.8	63	1.75	-2.44	-0.16
450	Male	36	17	99	1.43	0.79	1.39
451	Male	48	13.6	92	0.23	-2.7	-1.46
452	Male	25	11.8	83	0.63	-1.6	-0.4
453	Female	49	14.3	101	-0.91	-0.53	-0.93
454	Female	38	14.4	100	-0.62	0.92	0.09
455	Male	18	10.4	80	-0.05	-0.84	-0.45
456	Female	36	14.2	95	0.24	-0.02	0.19
457	Female	56	16.6	100	0.94	-1.58	-0.37
458	Male	14	8.8	76	-1.2	-0.83	-1.25
459	Female	12	9.2	70	1.29	-1.56	0.23
460	Female	48	13	87	0.98	-3.65	-1.58
461	Male	48	13	90	0.11	-3.18	-1.82
462	Male	18	8	70	-0.63	-4.55	-2.8
463	Female	16	8.8	70	0.82	-3.08	-0.9
464	Male	22	9.8	78	-0.34	-2.75	-1.61
465	Male	35	12	80	1.49	-4.21	-1.39
466	Male	27	13	80	2.4	-2.97	0.17
467	Male	48	16	100	0.49	-0.79	-0.17
468	Male	50	15	100	-0.29	-1.04	-0.83
469	Female	33	10.4	82	-0.29	-2.97	-2
470	Female	10	8	65	1.31	-2.62	-0.48
471	Male	33	9.4	81	-1.69	-3.67	-3.24
472	Male	10	6	65	-2.41	-3.62	-3.75
473	Female	46	13	95	-0.75	-1.54	-1.42
474	Male	9	8.5	70	0.11	-0.88	-0.42
475	Female	9	8	67	0.66	-1.3	-0.23
476	Female	23	8.4	77	-1.42	-2.68	-2.48
477	Male	36	12.6	87	0.43	-2.45	-1.07
478	Female	38	14	93	0.49	-0.88	-0.12
479	Female	21	8.6	75	-0.7	-2.82	-1.95
480	Male	20	13.4	90	0.64	2.06	1.48
481	Female	15	8.6	75	-0.7	-0.92	-0.91
482	Male	24	13	85	1.3	-0.7	0.59
483	Male	24	12	85	0.34	-0.7	-0.11
484	Male	24	7	70	-2.56	-5.6	-4.57
485	Male	48	17.6	102	1.17	-0.32	0.58
486	Male	36	14	90	1.02	-1.64	-0.2
487	Female	31	13	85	1.45	-1.8	0.06
488	Female	26	10.8	86	-0.86	-0.43	-0.79
489	Male	48	16.8	102	0.63	-0.32	0.21
490	Male	20	12	86	0.26	0.64	0.5
491	Female	48	13	84	1.68	-4.35	-1.58
492	Female	31	10.6	83	-0.32	-2.36	-1.61
493	Male	20	14	84	2.55	-0.07	1.88
494	Male	48	13	90	0.11	-3.18	-1.82
495	Male	27	10.6	80	0.02	-2.97	-1.59
496	Female	36	14	92	0.7	-0.8	0.08
497	Female	24	10	78	0.19	-2.4	-1.14
498	Male	15	10	73	1.14	-2.43	-0.28
499	Male	48	13.3	95	-0.7	-1.99	-1.64
500	Female	59	15.4	100	0.13	-1.88	-1.11
501	Female	54	12	100	-2.74	-1.36	-2.65
502	Female	40	12.8	98	-1.55	0.06	-1.02
503	Female	36	11.3	87	-0.58	-2.12	-1.63
504	Male	39	10.4	86	-1.72	-3.13	-2.94
505	Male	59	13.4	95	-0.6	-3.14	-2.32
506	Female	20	10	80	-0.1	-0.9	-0.51
507	Female	26	11	73	2.25	-4.34	-0.63
508	Female	46	14.8	92	1.3	-2.25	-0.44
509	Male	24	8.2	76	-2.26	-3.64	-3.42
510	Male	39	10	93	-3.93	-1.3	-3.25
511	Female	36	10.6	86	-1.08	-2.38	-2.16
512	Male	35	13.8	87	1.53	-2.3	-0.22
513	Female	14	9	68	1.61	-3.12	-0.34
514	Male	36	15	86	2.72	-2.72	0.37
515	Male	34	11.4	90	-1.56	-1.32	-1.72
516	Female	48	13.6	95	-0.24	-1.79	-1.24
517	Female	22	9	80	-1.31	-1.48	-1.72
518	Male	16	9	72	0.18	-3.18	-1.41
519	Female	39	12.8	87	0.81	-2.56	-0.92
520	Male	48	14.8	96	0.42	-1.75	-0.78
521	Male	19	8.6	70	0.25	-4.8	-2.31
522	Male	21	8.8	80	-2.13	-1.79	-2.41
523	Male	48	15	92	1.42	-2.7	-0.68
524	Male	9	6.2	62	-0.62	-4.44	-3.25
525	Male	36	15	85	2.95	-2.99	0.37
526	Male	24	9.6	77	-0.53	-3.31	-2.07
527	Female	39	11	85	-0.4	-3.07	-2.15
528	Male	7	8	65	1.15	-1.92	-0.33
529	Female	25	10.2	83	-0.76	-1.1	-1.12
530	Female	48	14.8	96	0.5	-1.56	-0.6
531	Male	6	6	55	3.08	-5.91	-2.51
532	Female	11	7	60	1.86	-5.07	-1.83
533	Female	26	11.2	85	-0.19	-0.73	-0.49
534	Male	24	10.8	82	-0.2	-1.68	-1.04
535	Female	48	14.6	100	-0.46	-0.63	-0.7
536	Male	15	7.6	70	-1.27	-3.62	-2.76
537	Female	14	8	70	-0.22	-2.38	-1.32
538	Male	12	8	64	1.54	-4.94	-1.7
539	Female	48	13.8	86	1.85	-3.88	-1.13
540	Female	33	9	71	0.62	-5.97	-3.23
541	Male	43	13.2	96	-1.01	-1.11	-1.31
542	Female	10	10.4	69	2.8	-1	1.64
543	Female	34	12.8	82	1.97	-3.13	-0.4
544	Female	48	12.8	92	-0.3	-2.49	-1.7
545	Female	23	10.8	78	1.17	-2.37	-0.35
546	Female	34	12.8	85	1.28	-2.33	-0.4
547	Male	48	16.2	105	-0.46	0.4	-0.07
548	Female	48	13.4	92	0.22	-2.49	-1.35
549	Male	10	8	70	-0.63	-1.43	-1.24
550	Female	19	10	70	2.15	-3.96	-0.35
551	Female	24	10	68	2.49	-5.49	-1.14
552	Male	17	10.8	80	0.4	-0.47	0.06
553	Male	36	13.8	95	-0.23	-0.29	-0.32
554	Male	21	10	75	0.61	-3.53	-1.28
555	Male	12	8.5	72	-0.52	-1.57	-1.15
556	Female	22	8	72	-0.77	-4.04	-2.75
557	Male	7	7.2	68	-1.26	-0.54	-1.29
558	Female	38	12	88	-0.14	-2.16	-1.34
559	Female	36	11.4	88	-0.72	-1.85	-1.56
560	Male	36	12	83	0.83	-3.53	-1.48
561	Male	23	9	74	-0.39	-4.32	-2.5
562	Female	18	9	72	0.54	-3	-1.06
563	Female	16	10.8	73	2.22	-2.01	0.77
564	Female	24	8.8	70	0.63	-4.87	-2.23
565	Female	35	12.6	90	-0.04	-1.15	-0.64
566	Male	39	13.4	95	-0.6	-0.78	-0.84
567	Female	48	11.6	87	-0.29	-3.65	-2.48
568	Male	40	13.6	95	-0.42	-0.94	-0.81
569	Male	48	14.6	95	0.46	-1.99	-0.89
570	Male	17	10	75	0.61	-2.36	-0.63
571	Female	36	11.6	85	0.2	-2.64	-1.41
572	Male	24	10.4	70	2.26	-5.6	-1.37
573	Female	48	13.2	96	-0.78	-1.56	-1.46
574	Female	12	9.8	73	1.21	-0.39	0.74
575	Female	24	12.8	79	2.6	-2.09	0.86
576	Male	8	8.4	70	-0.03	-0.28	-0.24
577	Male	42	14.8	94	0.84	-1.47	-0.29
578	Male	32	14.4	90	1.36	-0.96	0.44
579	Male	19	9	75	-0.66	-2.99	-1.91
580	Male	48	11.4	86	-0.55	-4.13	-2.88
581	Female	17	7.6	72	-1.36	-2.69	-2.33
582	Female	17	8	75	-1.53	-1.63	-1.88
583	Female	8	8	65	1.31	-1.59	0.05
584	Male	6	7	70	-2.32	1.1	-1.14
585	Female	9	8	65	1.31	-2.13	-0.23
586	Female	59	18	110	-0.35	0.23	-0.02
587	Male	48	14.5	100	-0.71	-0.79	-0.95
588	Male	14	10.2	70	2.25	-3.25	0.09
589	Female	18	12.2	75	3.03	-1.97	1.4
590	Female	36	11	85	-0.4	-2.64	-1.85
591	Male	19	10.6	80	0.17	-1.17	-0.45
592	Female	14	6	65	-1.88	-4.24	-3.73
593	Male	15	9.4	75	-0.13	-1.64	-0.84
594	Male	48	12.6	91	-0.51	-2.94	-2.07
595	Male	41	13	95	-0.99	-1.08	-1.26
596	Male	46	11.8	90	-1.11	-2.96	-2.46
597	Male	59	13.4	95	-0.6	-3.14	-2.32
598	Female	42	11.6	90	-0.99	-2.22	-1.99
599	Male	48	14.2	88	1.63	-3.65	-1.11
600	Male	47	12.6	85	0.93	-4.27	-2
601	Male	11	10	70	2.02	-1.95	0.56
602	Female	8	7.8	62	2.13	-2.86	-0.16
603	Female	8	8.8	67	1.66	-0.75	0.83
604	Male	46	14	98	-0.7	-1.02	-1.07
605	Male	24	8.8	73	-0.59	-4.62	-2.83
606	Male	24	8.8	76	-1.37	-3.64	-2.83
607	Female	11	7	60	1.86	-5.07	-1.83
608	Male	36	11.6	90	-1.33	-1.64	-1.77
609	Male	50	14.6	100	-0.62	-1.04	-1.04
610	Male	47	13.1	96	-1.1	-1.63	-1.68
611	Female	17	8	80	-2.71	0.12	-1.88
612	Female	10	7	70	-1.75	-0.59	-1.59
613	Male	24	8	78	-3.06	-2.99	-3.61
614	Male	59	13	100	-2.09	-2.05	-2.55
615	Female	15	7.6	72	-1.36	-2.02	-1.96
616	Male	24	8	83	-4.19	-1.35	-3.61
617	Female	48	14	97	-0.32	-1.33	-1.02
618	Male	48	12.8	90	-0.08	-3.18	-1.94
619	Female	23	8	77	-2	-2.68	-2.91
620	Female	31	10.4	83	-0.54	-2.36	-1.77
621	Male	29	12.2	88	-0.21	-0.95	-0.62
622	Male	15	11.4	76	1.89	-1.25	0.91
623	Female	20	10.6	70	2.74	-4.22	-0.04
624	Male	48	15.8	90	2.45	-3.18	-0.27
625	Female	22	12.8	80	2.54	-1.48	1.16
626	Male	17	8.6	67	1.26	-5.39	-1.99
627	Male	15	7	65	-0.46	-5.6	-3.45
628	Male	18	10	70	2.02	-4.55	-0.81
629	Female	56	14.4	103	-1.26	-0.93	-1.4
630	Male	24	10	75	0.43	-3.97	-1.71
631	Female	18	8	75	-1.53	-1.97	-2.07
632	Female	59	15.8	100	0.41	-1.88	-0.92
633	Male	27	9	80	-2	-2.97	-3.01
634	Female	59	14	100	-0.94	-1.88	-1.8
635	Female	48	13	90	0.31	-2.96	-1.58
636	Male	32	11.4	80	0.89	-3.81	-1.53
637	Female	57	17	110	-0.97	0.47	-0.28
638	Male	59	13	97	-1.42	-2.7	-2.55
639	Female	6	7	60	1.86	-2.54	-0.35
640	Female	7	10	70	2.15	1.17	2.18
641	Male	38	15.4	100	0.03	0.69	0.39
642	Female	9	6.2	60	0.58	-4.2	-2.37
643	Female	17	9	70	1.06	-3.39	-0.88
644	Female	48	13.8	90	0.96	-2.96	-1.13
645	Male	48	14.6	87	2.18	-3.89	-0.89
646	Male	15	9.2	75	-0.39	-1.64	-1.04
647	Female	37	10.4	87	-1.55	-2.27	-2.42
648	Male	17	11	80	0.61	-0.47	0.23
649	Male	26	16.4	97	1.44	2.58	2.31
650	Female	49	16	90	2.52	-3.06	-0.11
651	Male	48	18.4	105	1.02	0.4	0.92
652	Male	16	8.8	75	-0.94	-2.02	-1.61
653	Female	36	15.2	90	1.99	-1.33	0.71
654	Female	36	15	90	1.85	-1.33	0.61
655	Female	45	13.4	100	-1.44	-0.22	-1.11
656	Male	36	14	94	0.16	-0.56	-0.2
657	Male	27	11.6	92	-1.8	0.73	-0.81
658	Female	30	12.8	86	1.04	-1.32	0.06
659	Female	40	12	88	-0.14	-2.45	-1.53
660	Male	36	12.4	86	0.49	-2.72	-1.21
661	Male	59	18.4	104	1.24	-1.18	0.09
662	Female	25	12.4	87	0.46	0.12	0.47
663	Female	48	14	98	-0.52	-1.1	-1.02
664	Male	12	9.2	70	1.06	-2.42	-0.43
665	Male	36	10	80	-0.68	-4.34	-3.01
666	Male	11	8	70	-0.63	-1.95	-1.48
667	Male	15	9	67	1.79	-4.81	-1.23
668	Female	6	7	60	1.86	-2.54	-0.35
669	Female	48	15.4	100	0.13	-0.63	-0.31
670	Male	27	9.8	77	-0.28	-3.9	-2.27
671	Female	48	16	104	-0.3	0.29	-0.03
672	Male	24	11.2	75	1.75	-3.97	-0.72
673	Male	58	14	100	-1.14	-1.94	-1.91
674	Male	48	14	100	-1.14	-0.79	-1.23
675	Female	27	12.2	88	0.05	-0.09	0.06
676	Male	42	13	93	-0.55	-1.73	-1.35
677	Female	59	16.4	100	0.81	-1.88	-0.66
678	Female	33	12.6	85	1.11	-2.16	-0.42
679	Male	24	9.6	80	-1.19	-2.33	-2.07
680	Male	41	12.8	93	-0.75	-1.59	-1.39
681	Female	10	8.2	67	0.92	-1.81	-0.27
682	Female	36	15.5	92	1.79	-0.8	0.85
683	Female	40	10.8	80	0.6	-4.46	-2.4
684	Male	36	11.8	90	-1.11	-1.64	-1.62
685	Female	30	10	90	-2.76	-0.19	-1.97
686	Female	25	18.4	100	2.01	4.09	3.48
687	Male	19	9	80	-1.84	-1.17	-1.91
688	Male	8	7.2	62	1.17	-3.91	-1.64
689	Female	12	8.4	68	0.88	-2.33	-0.52
690	Male	36	12	85	0.34	-2.99	-1.48
691	Male	18	8.2	75	-1.83	-2.69	-2.58
692	Female	24	8.3	80	-2.44	-1.78	-2.75
693	Male	36	7.4	75	-3.32	-5.69	-5.07
694	Male	48	14	90	1.02	-3.18	-1.23
695	Male	7	7	67	-1.24	-1	-1.54
696	Male	16	7	65	-0.46	-5.89	-3.61
697	Male	36	13	90	0.11	-1.64	-0.81
698	Male	48	13	98	-1.64	-1.27	-1.82
699	Female	25	12	78	2.14	-2.62	0.21
700	Female	56	15.2	100	-0.02	-1.58	-1
701	Female	48	13.4	95	-0.4	-1.79	-1.35
702	Male	40	11.4	92	-2.03	-1.71	-2.26
703	Male	36	9.8	75	0.19	-5.69	-3.17
704	Male	20	8.2	72	-0.96	-4.34	-2.89
705	Female	16	8	66	0.98	-4.51	-1.7
706	Male	51	13.6	90	0.66	-3.48	-1.68
707	Male	36	12.4	90	-0.48	-1.64	-1.21
